# Supplementary material
Source: PubMed Central journal article supplement (PMC8717802)
Supplement: svn-2020-000695supp001.pdf [file svn-2020-000695supp001.pdf]

**Supplementary Appendix:****Supplement to:** Global Impact of the COVID-19 Pandemic on Subarachnoid Hemorrhage.

This appendix has been provided by the authors to give readers additional information about their work.

**Content:****Tables:****Table S1:** Subarachnoid hemorrhage hospitalization volumes across the world immediately before and during the COVID-19 pandemic.....2**Table S2:** Ruptured aneurysm embolization volumes across the world immediately before and during the COVID-19 pandemic ..... 3**Table S3:** Country-specific relative changes in subarachnoid hemorrhage hospitalizations and ruptured aneurysm embolization procedures over the COVID-19 Pandemic.....4**Figures:****Figure S1:** Cumulative 3-Month Percentage Changes in SAH Hospitalizations Over the COVID-19 Pandemic .....6**Figure S2:** Cumulative 3-Month Percentage Changes in SAH Coiling Volumes Over the COVID-19 Pandemic.....7

**Table S1. Subarachnoid Hemorrhage hospitalization volumes across the world immediately before and during the COVID-19 pandemic.**

|                      | Overall volume |       |       |                       | P       | N            | Monthly volume                 |                             |                         | P       |
|----------------------|----------------|-------|-------|-----------------------|---------|--------------|--------------------------------|-----------------------------|-------------------------|---------|
|                      | N              | n1    | n2    | Relative (%) change   |         |              | Immediately before<br>n= 2,838 | During COVID-19<br>n= 1,645 | Difference*<br>(95% CI) |         |
|                      | % (95% CI)     |       |       |                       |         | Median (IQR) |                                |                             |                         |         |
| <b>Overall</b>       | 118            | 2,044 | 1,585 | -22.5 (-24.3 - -20.7) | <0.0001 | 124          | 4.5 (2.5-7.1)                  | 3.3 (1.3-6.3)               | -0.88 (-1.1 - -0.58)    | <0.0001 |
| <b>Asia</b>          | 47             | 717   | 540   | -24.7 (-28.0 - -21.7) | <0.0001 | 48           | 4.0 (1.8-6.3)                  | 2.3 (1.2-6.0)               | -0.79 (-1.4 - -0.08)    | 0.003   |
| <b>North America</b> | 46             | 762   | 602   | -21.0 (-24.0 - -18.3) | <0.0001 | 49           | 4.5 (2.8-7.0)                  | 3.7 (2.0-5.7)               | -1.0 (-1.6 - -0.33)     | <0.0001 |
| <b>Europe</b>        | 11             | 224   | 159   | -29.0 (-35.3 - -23.5) | 0.001   | 12           | 6.4 (5.3-7.9)                  | 4.7 (3.5-6.5)               | -0.96 (-2.1 - 0.0)      | 0.019   |
| <b>South America</b> | 8              | 223   | 175   | -21.5 (-27.4 - -16.6) | 0.012   | 9            | 3.8 (2.0-14.3)                 | 3.7 (1.3-13.0)              | -1.0 (-5.8 - 0.92)      | 0.164   |
| <b>Oceania</b>       | 4              | 55    | 56    | 1.8 (0.32 - 9.6)      | 0.971   | 4            | 4.4 (2.5-6.5)                  | 4.2 (3.8-5.5)               | 0.54 (-1.9 - 1.5)       | 1.0     |
| <b>Africa</b>        | 2              | 63    | 53    | -15.9 (-26.8 - -8.9)  | 0.324   | 2            | 11.4 (9.5-13.3)                | 8.8 (8.0-9.7)               | -2.5 (-5.3 - 0.17)      | 1.0     |

Abbreviations: N= number of hospitals; n= number of admissions; CI= confidence interval; IQR= interquartile range

Note: The n1 is based on 3 months before pandemic (December 2019 to February 2020). Immediately before is based on 4 months before pandemic (November 2019 to February 2020). The n2 and During COVID-19 are based on March 2020 to May 2020.

P-value is from Poisson means test (overall volume analysis) and Wilcoxon signed-rank test (monthly volume analysis)

\*Difference denotes the median difference between the two time periods

**Table S2. Ruptured aneurysm coil embolization volumes across the world immediately before and during the COVID-19 pandemic.**

|                      | Overall volume |       |       |                       | P     | Monthly volume |                                |                             |                         |        |
|----------------------|----------------|-------|-------|-----------------------|-------|----------------|--------------------------------|-----------------------------|-------------------------|--------|
|                      | N              | n1    | n2    | Relative (%) change   |       | N              | Immediately before<br>n= 1,670 | During COVID-19<br>n= 1,075 | Difference*<br>(95% CI) | P      |
|                      | % (95% CI)     |       |       |                       |       | Median (IQR)   |                                |                             |                         |        |
| <b>Overall</b>       | 125            | 1,170 | 1,035 | -11.5 (-13.5 - -9.8)  | 0.002 | 133            | 1.8 (1.0-4.0)                  | 1.7 (0.67-3.3)              | -0.25 (-0.58 - -0.08)   | 0.0004 |
| <b>Asia</b>          | 52             | 357   | 284   | -20.5 (-24.9 - -16.6) | 0.003 | 54             | 1.5 (1.0-2.8)                  | 1.0 (0.33-2.0)              | -0.42 (-0.83 - 0.0)     | 0.007  |
| <b>North America</b> | 43             | 340   | 306   | -10.0 (-13.7 - -7.2)  | 0.140 | 45             | 1.8 (1.3-3.8)                  | 2.0 (1.0-3.0)               | -0.17 (-0.75 - 0.08)    | 0.081  |
| <b>Europe</b>        | 14             | 242   | 205   | -15.3 (-20.4 - -11.3) | 0.062 | 17             | 4.5 (1.8-7.5)                  | 3.0 (2.0-5.7)               | -0.67 (-1.5 - 0.0)      | 0.085  |
| <b>South America</b> | 9              | 141   | 145   | 2.8 (1.1 - 7.1)       | 0.886 | 10             | 2.8 (0.75-9.5)                 | 3.3 (0.33-9.3)              | -0.25 (-1.9 - 2.2)      | 0.414  |
| <b>Oceania</b>       | 4              | 18    | 32    | 77.8 (54.8 - 91.0)    | 0.055 | 4              | 1.1 (0.63-2.5)                 | 2.7 (2.2-3.2)               | 1.4 (-0.17 - 1.8)       | 0.250  |
| <b>Africa</b>        | 3              | 72    | 63    | -12.5 (-22.1 - -6.7)  | 0.402 | 3              | 9.5 (4.8-12.0)                 | 9.7 (1.7-9.7)               | -2.3 (-3.1 - 0.17)      | 0.50   |

Abbreviations: N= number of hospitals; n= number of procedures; CI= confidence interval; IQR= interquartile range

Note: The n1 is based on 3 months before pandemic (December 2019 to February 2020). Immediately before is based on 4 months before pandemic (November 2019 to February 2020). The n2 and During COVID-19 are based on March 2020 to May 2020.

P-value is from Poisson means test (overall volume analysis) and Wilcoxon signed-rank test (monthly volume analysis)

\*Difference denotes the median difference between the two time periods

**Table S3. Country-specific relative changes in Subarachnoid Hemorrhage admissions and Coil embolization procedures over the COVID-19 Pandemic.**

| Continent     | Country              | Subarachnoid Hemorrhage admissions |     |                      |                                   | SAH Coil embolization procedures |     |                     |                                   |
|---------------|----------------------|------------------------------------|-----|----------------------|-----------------------------------|----------------------------------|-----|---------------------|-----------------------------------|
|               |                      | N                                  | n1  | n2                   | Relative (%) change<br>% (95% CI) | N                                | n1  | n2                  | Relative (%) change<br>% (95% CI) |
| Asia          | Japan                | 29                                 | 294 | 208                  | -29.3 (-34.7 - -24.3)             | 29                               | 120 | 98                  | -18.3 (-26.2 - -12.4)             |
|               | China                | 2                                  | 26  | 33                   | +26.9 (13.7 - 46.1)               | 6                                | 16  | 20                  | +25.0 (10.2 - 49.5)               |
|               | South Korea          | 3                                  | 55  | 76                   | +38.2 (26.5 - 51.4)               | 3                                | 30  | 41                  | +36.7 (21.9 - 54.5)               |
|               | India                | 3                                  | 43  | 15                   | -65.1 (-77.6 - -50.2)             | 3                                | 24  | 6                   | -75.0 (-88.0 - -55.1)             |
|               | Vietnam              | N/A                                |     |                      |                                   | 1                                | 26  | 25                  | -3.9 (-18.9 - -0.68)              |
|               | Saudi Arabia         | 1                                  | 8   | 1                    | -87.5 (-97.8 - -52.9)             | 1                                | 6   | 3                   | -50.0 (-81.2 - -18.8)             |
|               | Turkey               | 2                                  | 44  | 30                   | -31.8 (-46.6 - -20.0)             | 2                                | 16  | 6                   | -62.5 (-81.5 - -38.6)             |
|               | Indonesia            | 1                                  | 20  | 9                    | -55.0 (-74.2 - -34.2)             | 1                                | 8   | 2                   | -75.0 (-92.9 - -40.9)             |
|               | Israel               | N/A                                |     |                      |                                   | 1                                | 10  | 11                  | +10.0 (1.8 - 40.4)                |
|               | Oman                 | 1                                  | 16  | 10                   | -37.5 (-61.4 - -18.5)             | 1                                | 3   | 5                   | +66.7 (20.8 - 93.9)               |
|               | Pakistan             | 1                                  | 81  | 61                   | -24.7 (-35.1 - -16.6)             | 1                                | 53  | 38                  | -28.3 (-41.6 - -18.0)             |
|               | Qatar                | 1                                  | 72  | 42                   | -41.7 (-53.2 - -31.0)             | N/A                              |     |                     |                                   |
|               | Thailand             | 1                                  | 14  | 18                   | +28.6 (11.7 - 54.7)               | 1                                | 5   | 8                   | +60.0 (23.1 - 88.2)               |
|               | United Arab Emirates | 1                                  | 31  | 33                   | +6.5 (1.8 - 20.7)                 | 1                                | 30  | 18                  | -40.0 (-57.7 - -24.6)             |
|               | Lebanon              | 1                                  | 13  | 4                    | -69.2 (-87.3 - -42.4)             | 1                                | 10  | 3                   | -70.0 (-89.2 - -39.7)             |
| North America | United States        | 41                                 | 681 | 532                  | -21.9 (-25.1 - -18.9)             | 38                               | 290 | 259                 | -10.7 (-14.8 - -7.6)              |
|               | Canada               | 5                                  | 81  | 70                   | -13.6 (-22.7 - -7.8)              | 5                                | 50  | 47                  | -6.0 (-16.2 - -2.1)               |
| Europe        | France               | 2                                  | 39  | 30                   | -23.1 (-38.3 - -12.7)             | 4                                | 94  | 64                  | -31.9 (-41.9 - -23.4)             |
|               | Switzerland          | 2                                  | 35  | 16                   | -54.3 (-69.5 - -38.2)             | 2                                | 9   | 6                   | -33.3 (-64.6 - -12.1)             |
|               | Spain                | 1                                  | 27  | 9                    | -66.7 (-81.4 - -47.8)             | 1                                | 5   | 2                   | -60.0 (-88.2 - -23.1)             |
|               | Germany              | 1                                  | 17  | 12                   | -29.4 (-53.1 - -13.3)             | 1                                | 10  | 8                   | -20.0 (-51.0 - -5.7)              |
|               | Austria              | 1                                  | 18  | 13                   | -27.8 (-50.9 - -12.5)             | N/A                              |     |                     |                                   |
|               | Greece               | 1                                  | 2   | 2                    | 0.0 (0.0 - 65.8)                  | N/A                              |     |                     |                                   |
|               | Ireland              | 1                                  | 44  | 38                   | -13.6 (-26.7 - -6)                | 1                                | 33  | 28                  | -15.2 (-30.9 - -6.7)              |
|               | Italy                | 1                                  | 18  | 18                   | 0.0 (0.0 - 17.6)                  | 1                                | 17  | 14                  | -17.7 (-41.0 - -6.2)              |
| Portugal      | 1                    | 24                                 | 21  | -12.5 (-31.0 - -4.3) | 1                                 | 5                                | 8   | +60.0 (23.1 - 88.2) |                                   |

**Table S3. Country-specific relative changes in Subarachnoid Hemorrhage admissions and Coil embolization procedures over the COVID-19 Pandemic continued.**

| Continent          | Country      | Subarachnoid Hemorrhage admissions |       |       |                       | Coil embolization procedures |       |       |                       |
|--------------------|--------------|------------------------------------|-------|-------|-----------------------|------------------------------|-------|-------|-----------------------|
|                    |              | N                                  | n1    | n2    | Relative (%) change   | N                            | n1    | n2    | Relative (%) change   |
|                    |              | % (95% CI)                         |       |       |                       | % (95% CI)                   |       |       |                       |
| Europe (continued) | England      | N/A                                |       |       |                       | 2                            | 41    | 56    | +36.6 (23.6 – 51.9)   |
|                    | Croatia      | N/A                                |       |       |                       | 1                            | 28    | 19    | -32.1 (-50.7 - -17.9) |
| South America      | Brazil       | 6                                  | 160   | 120   | -25.0 (-32.2 - -18.9) | 6                            | 74    | 74    | 0.0 (0.0 - 4.9)       |
|                    | Chile        | 1                                  | 3     | 1     | -66.7 (-93.9 - -20.8) | 1                            | 1     | 0     | -100 (-100 - -20.7)   |
|                    | Argentina    | 1                                  | 60    | 54    | -10.0 (-20.2 - -4.7)  | 1                            | 56    | 51    | -8.9 (-19.3 - -3.9)   |
|                    | Uruguay      | N/A                                |       |       |                       | 1                            | 10    | 20    | +100 (72.3 - 100)     |
| Oceania            | Australia    | 3                                  | 47    | 45    | -4.3 (-14.3 - -1.2)   | 3                            | 14    | 23    | +64.3 (38.8 – 83.7)   |
|                    | New Zealand  | 1                                  | 8     | 11    | +37.5 (13.7 - 69.4)   | 1                            | 4     | 9     | +125 (NaN)            |
| Africa             | Egypt        | 1                                  | 42    | 24    | -42.9 (-57.8 - -29.1) | 1                            | 15    | 5     | -66.7 (-84.8 - -41.7) |
|                    | Tunisia      | 1                                  | 21    | 29    | 38.1 (20.8 - 59.1)    | 1                            | 21    | 29    | 38.1 (20.8 - 59.1)    |
|                    | South Africa | N/A                                |       |       |                       | 1                            | 36    | 29    | -19.4 (-35.0 - -9.8)  |
| Total              | 37           | 118                                | 2,044 | 1,585 | -22.5 (-24.3 - -20.7) | 125                          | 1,170 | 1,035 | -11.5 (-13.5 - -9.8)  |

Abbreviations: N= number of hospitals; n= number of procedures/admissions; CI= confidence interval; N/A= not available;

NaN = confidence interval could not be computed

Note: The n1 is based on 3 months before pandemic (December 2019 to February 2020). The n2 is based on March 2020 to May 2020.

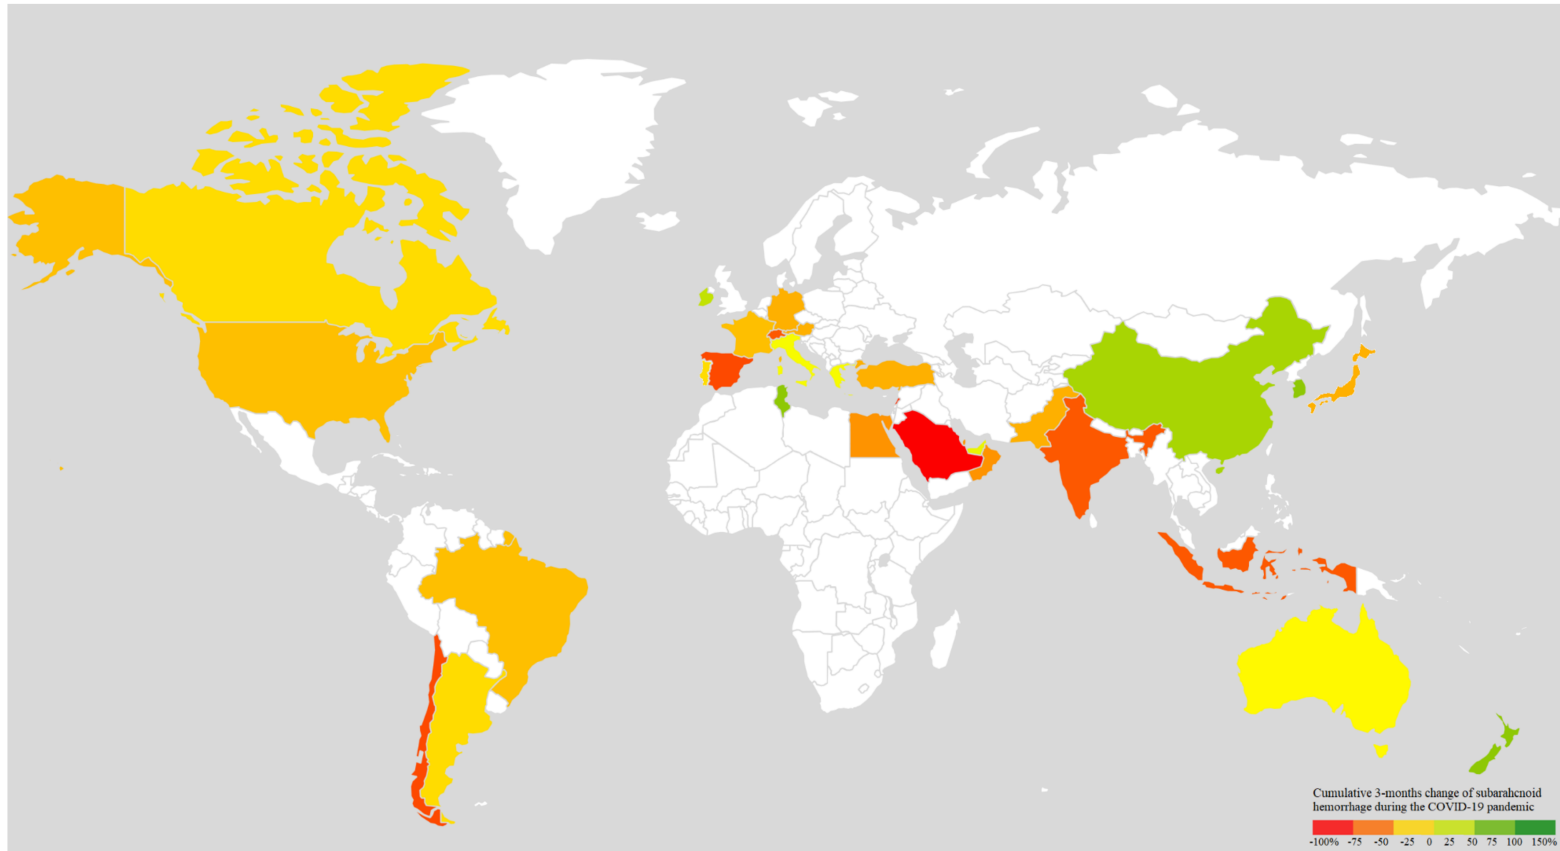

**Figure S1.** Cumulative 3-Month Percentage Changes in SAH Hospitalizations Over the COVID-19 Pandemic

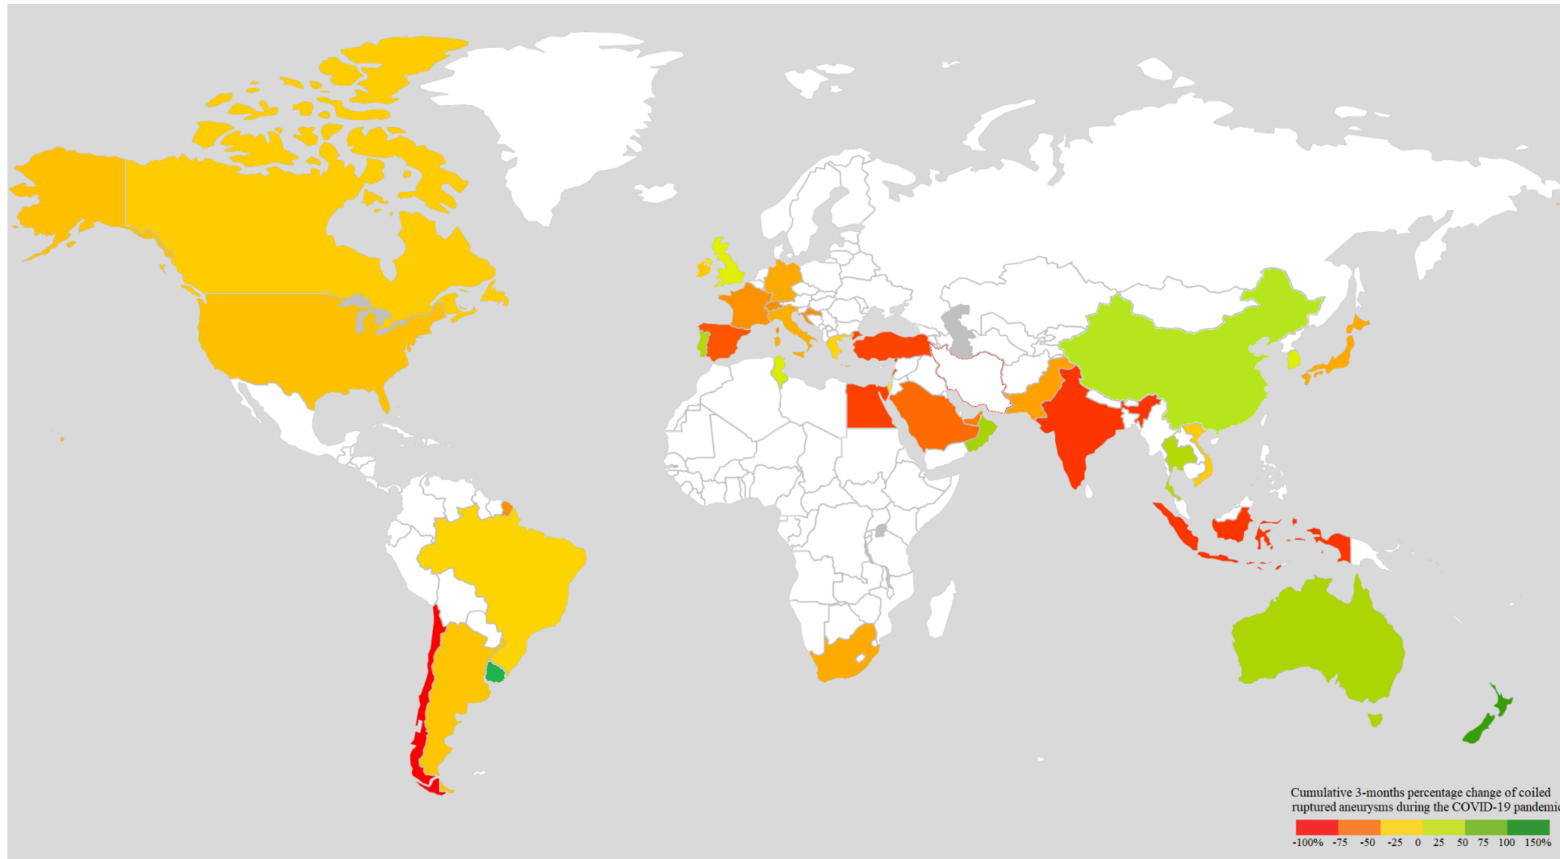

**Figure S2:** Cumulative 3-Month Percentage Changes in Ruptured Aneurysm Embolization Volumes Over the COVID-19 Pandemic
